# Supplementary material for: Suppression of Cutibacterium acnes-Mediated Inflammatory Reactions by Fibroblast Growth Factor 21 in Skin
Source: MDPI journal article supplement (doi:10.3390/ijms23073589), 2022-03-25
Supplement: s1 [file s1]

**Table S1.** A list of abbreviations in this study.

| Abbreviations     | Full Names                           |
|-------------------|--------------------------------------|
| <i>C. acnes</i>   | <i>Cutibacterium acnes</i>           |
| FGF21             | Fibroblast growth factor 21          |
| FGFR1             | Fibroblast growth factor receptor 1  |
| KLB               | $\beta$ -Klotho                      |
| TLR2              | Toll-like receptor 2                 |
| NF- $\kappa$ B    | Nuclear factor- $\kappa$ B           |
| MAPK              | Mitogen-activated protein kinase     |
| IL-1 $\beta$ /6/8 | Interleukin (IL)-1 $\beta$ /6/8      |
| TNF- $\alpha$     | Tumor necrosis factor- $\alpha$      |
| FBS               | Fetal bovine serum                   |
| NHDF              | Normal human dermal fibroblasts      |
| NHEK              | Normal human epidermal keratinocytes |

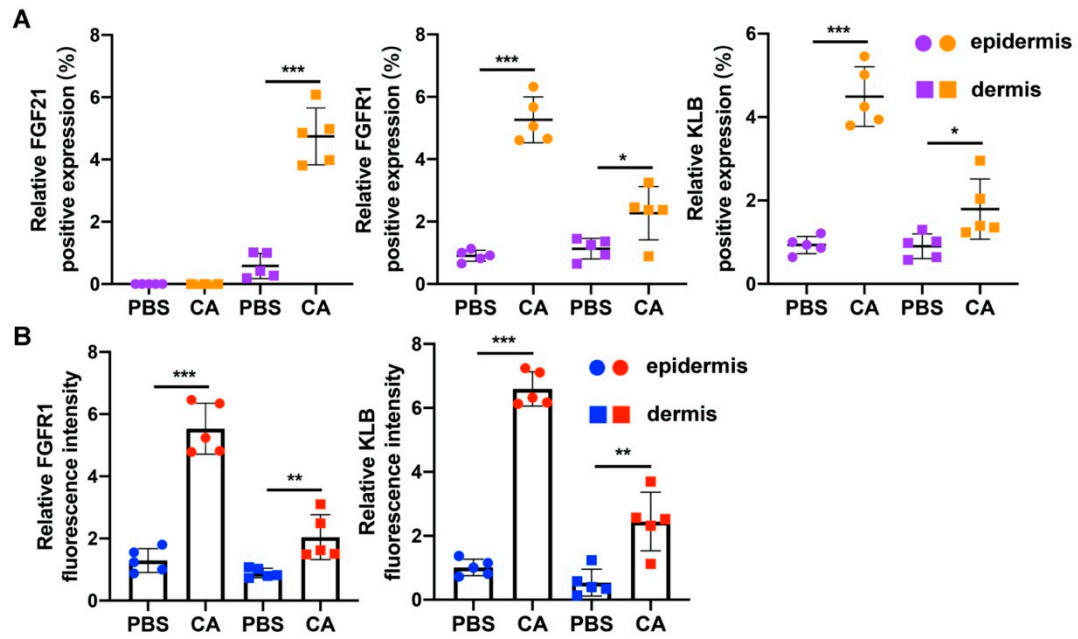

**Figure S1. Immunohistochemistry (IHC) and immunofluorescence staining of FGF21, FGFR1, KLB in mouse ears.**

(A) Analysis of FGF21, FGFR1 and KLB positive expression in the epidermis and dermis in ears of PBS or *C. acnes*-induced mice (n = 5 mice/group). (B) Analysis of FGFR1 and KLB fluorescence intensity in the epidermis and dermis in ears of PBS or *C. acnes*-induced mice (n = 5 mice/group). All data are presented as mean  $\pm$  SD, \* $P$  < 0.05, \*\* $P$  < 0.01, \*\*\* $P$  < 0.001.

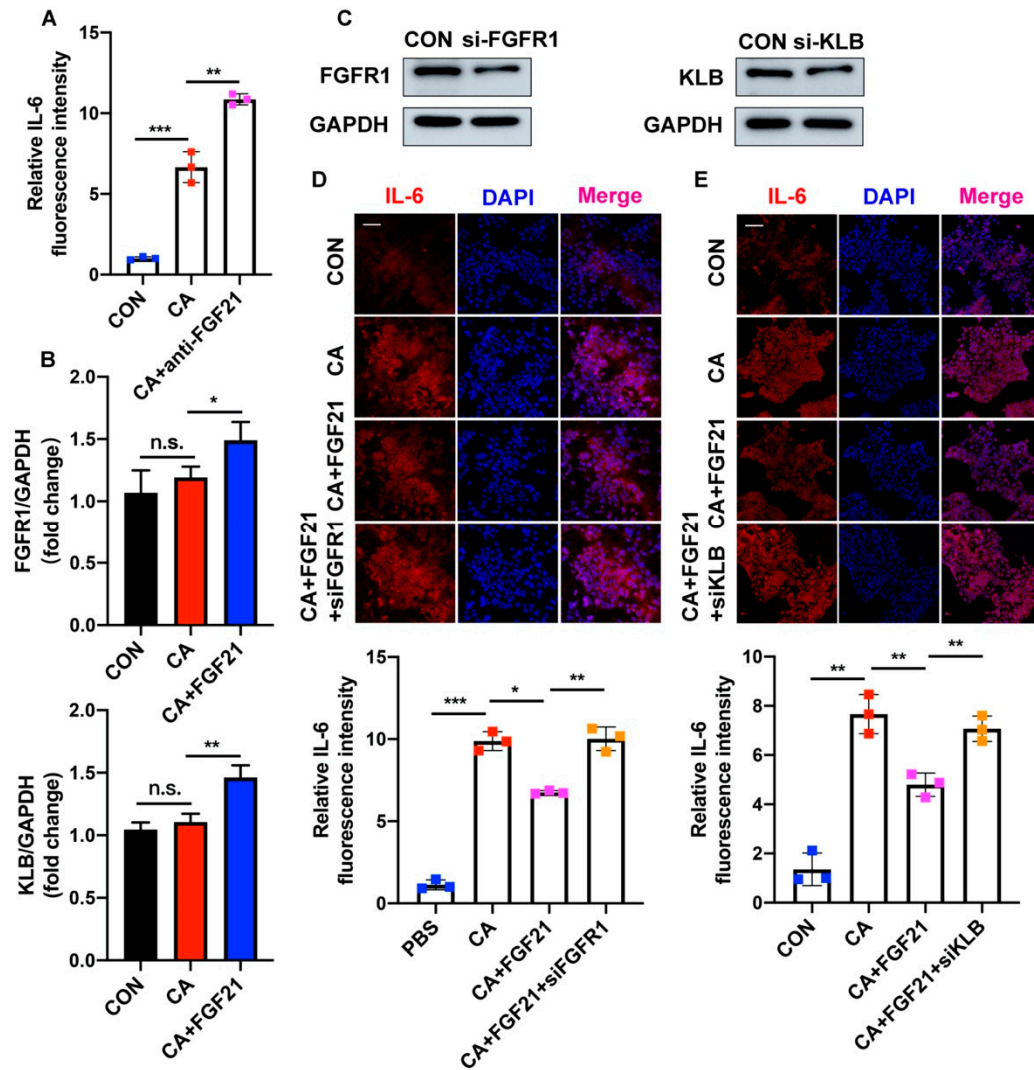

**Figure S2. Blocking of FGF21, FGFR1 and KLB increased the expression of proinflammatory cytokines.**

(A) Immunofluorescence staining of IL-6 in the fibroblast-keratinocyte co-culture system. (B) Quantification of FGFR1 and KLB at protein levels. (C) Protein expression levels of FGFR1 and KLB in FGFR1-specific or KLB-specific siRNA interference HaCat cells. (D, E) Representative confocal scans were shown for IL-6 (red) after transfection of FGFR1 and KLB small interfering RNA, nuclei were stained with DAPI (blue). Scale bars = 100  $\mu$ m. All data are presented as mean  $\pm$  SD, \* $P$  < 0.05, \*\* $P$  < 0.01, \*\*\* $P$  < 0.001, n.s., non-significant.

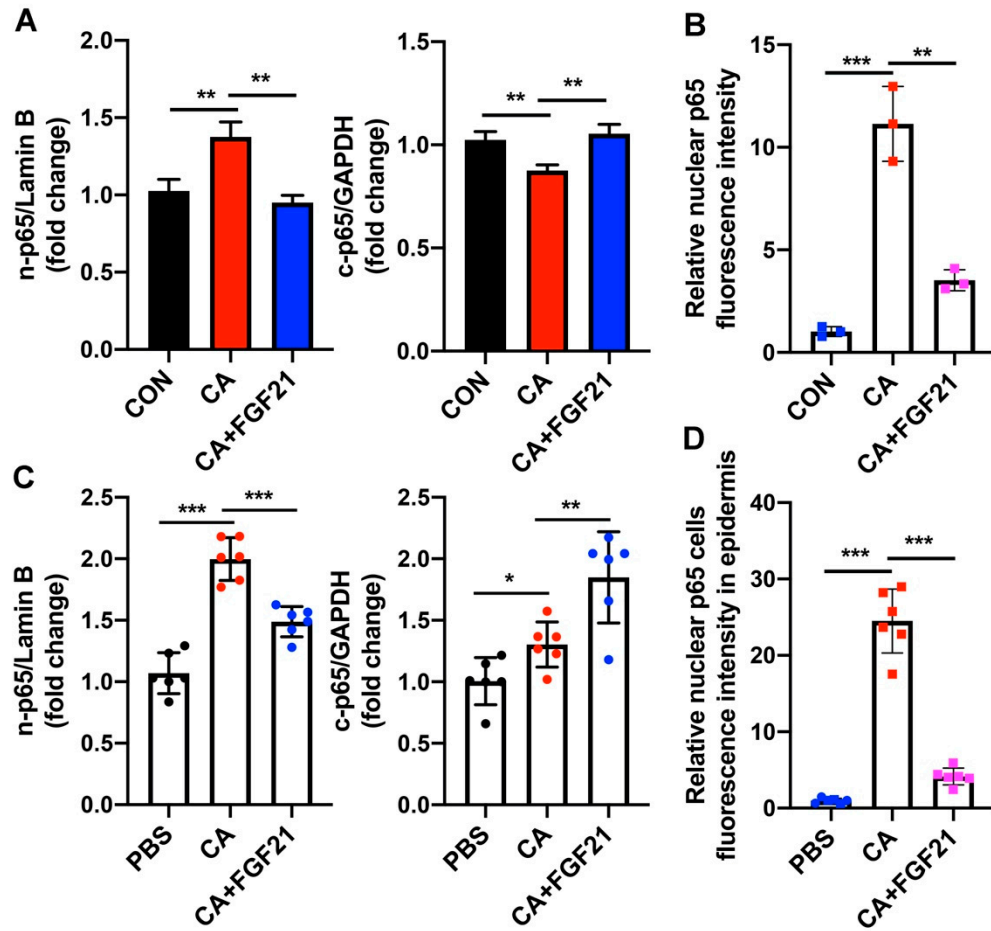

**Figure S3. FGF21 inhibits *C. acnes*-induced translocation of p53 into the nucleus.**

Quantification of the p53 from HaCaT cells (A) and ear tissue (C) in cytoplasmic and nuclear extracts.

The statistics of nuclear p53 fluorescence intensity in HaCaT cells (B) and mice ears (D). All data are presented as mean  $\pm$  SD, \* $P < 0.05$ , \*\* $P < 0.01$ , \*\*\* $P < 0.001$ .

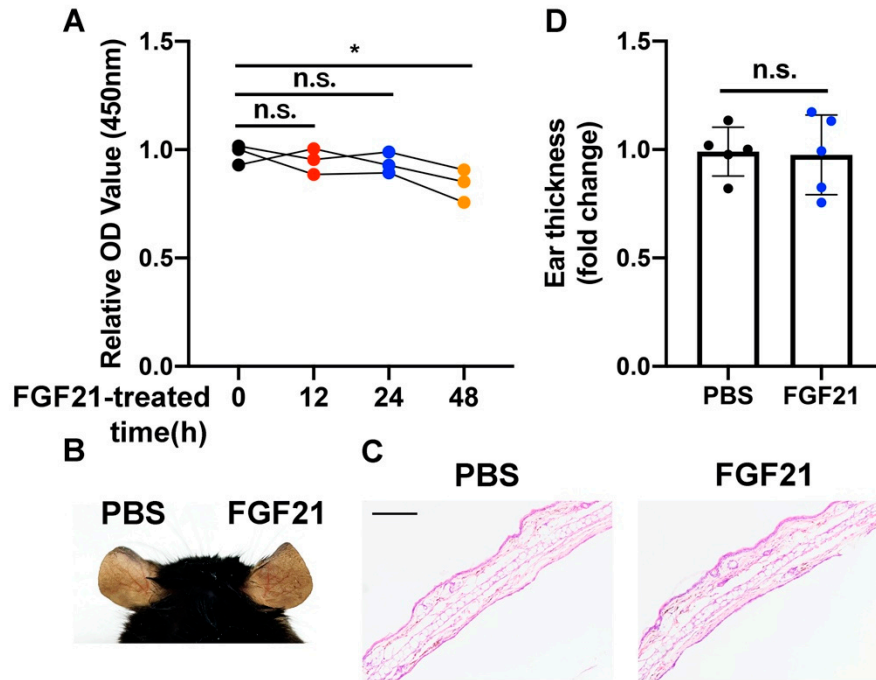

**Figure S4. Cytotoxic effects of FGF21 in HaCaT cells and mouse ears.**

(A) Cytotoxicity of FGF21 was determined by CCK-8 assay in HaCaT cells. The HaCaT cells were treated with 20 ng/mL of FGF21 for 6, 12, and 24 h. (B) The image of mice ears subjected to inject PBS or FGF21 (50  $\mu$ g/mL). (C, D) Histological changes and ear thickness were measured by H&E staining. All data are presented as mean  $\pm$  SD, \* $P$  < 0.05, n.s., non-significant.
